# Supplementary material
Source: Springer Nature journal article supplement (https://www.springermedizin.de/resource/supplementary/12936_2013_3028_MOESM2_ESM.pdf/9544880)

**A**

|                 |             |              |              |              |
|-----------------|-------------|--------------|--------------|--------------|
| n               | 372         | 371          | 274          | 267          |
| <b>Average</b>  | <b>71.3</b> | <b>109.5</b> | <b>112.7</b> | <b>137.3</b> |
| <b>SD</b>       | <b>2.0</b>  | <b>3.4</b>   | <b>2.6</b>   | <b>2.3</b>   |
| Max             | 74          | 118          | 118          | 143          |
| Min             | 63          | 98           | 102          | 130          |
| <b>Expected</b> | <b>70</b>   | <b>108</b>   | <b>115</b>   | <b>137</b>   |

**B**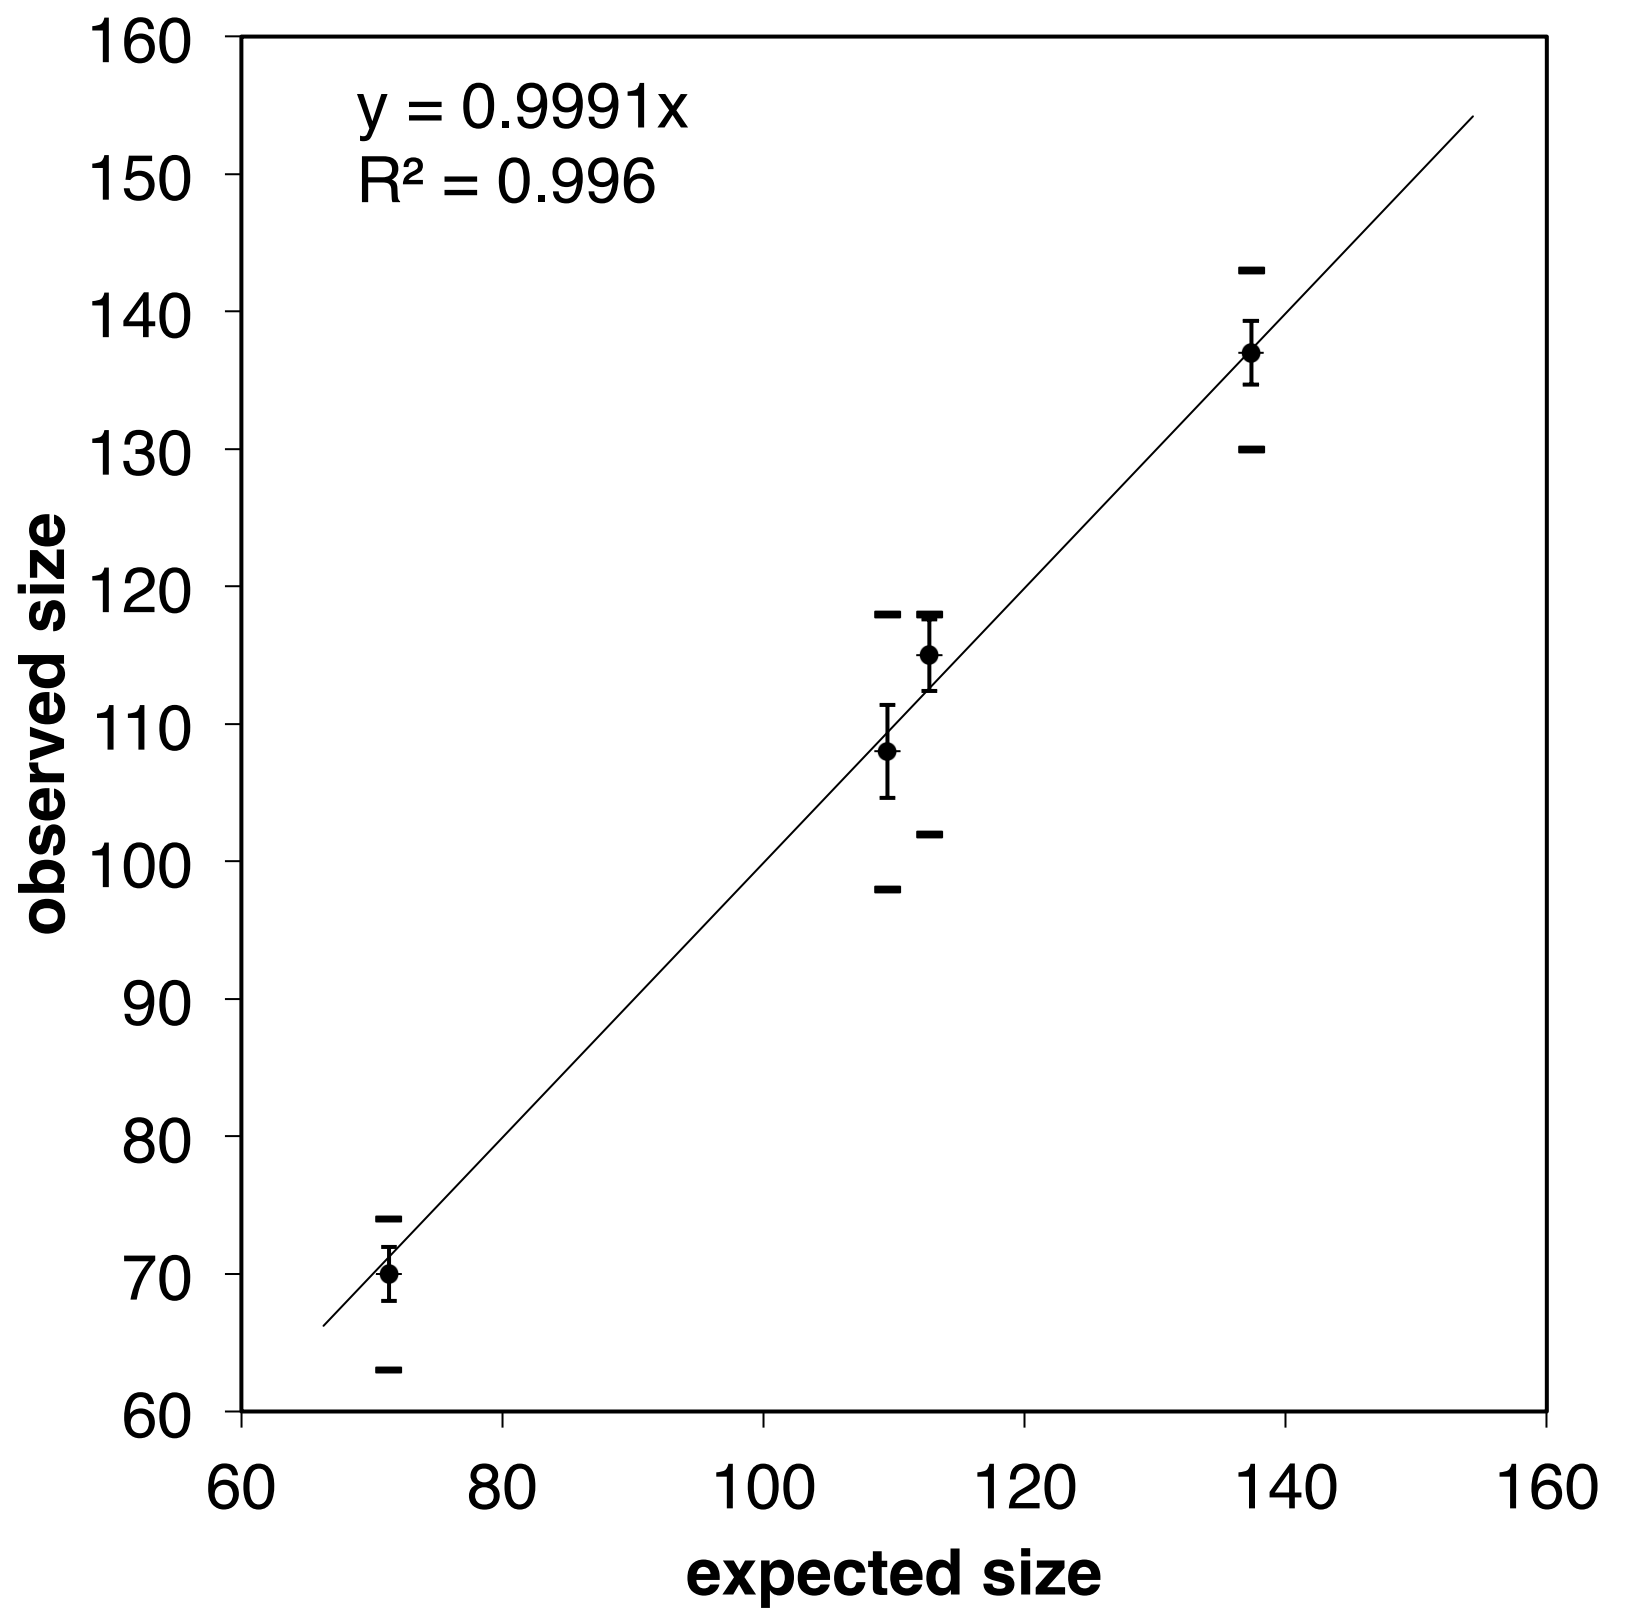

Supplement: MOESM2 [file 9544880]
